# Supplementary material
Source: MDPI journal article supplement (https://www.mdpi.com/2311-7524/7/11/511)
Supplement: s1 [file s1]

## Supplementary materials

**Table S1.** Numbers of different callus types in each Substrate Sterilization combination for each variety, scored after eight months of culture, losses due to infection were excluded.

| Cultivar   | Callus types              | C - LS | C - HS | NC - LS | NC - HS | Total |
|------------|---------------------------|--------|--------|---------|---------|-------|
| Italia     | ● Flower                  | 1295   | 525    | 1365    | 455     | 3640  |
|            | ● Total callus (TC)       | 174    | 56     | 131     | 39      | 400   |
|            | ● Friable callus (FC)     | 150    | 46     | 122     | 33      | 351   |
|            | ● Hard callus (HC)        | 23     | 6      | 5       | 2       | 36    |
|            | ● Embryogenic callus (EC) | 1      | 4      | 4       | 4       | 13    |
| Aglianico  | ● Flower                  | 490    | 210    | 490     | 210     | 1400  |
|            | ● Total callus (TC)       | 96     | 61     | 47      | 54      | 258   |
|            | ● Friable callus (FC)     | 62     | 26     | 23      | 40      | 151   |
|            | ● Hard callus (HC)        | 20     | 33     | 12      | 12      | 77    |
|            | ● Embryogenic callus (EC) | 14     | 2      | 12      | 2       | 30    |
| Chardonnay | ● Flower                  | 140    | 280    | 210     | 210     | 840   |
|            | ● Total callus (TC)       | 50     | 163    | 30      | 81      | 324   |
|            | ● Friable callus (FC)     | 21     | 66     | 11      | 44      | 142   |
|            | ● Hard callus (HC)        | 3      | 14     | 11      | 12      | 40    |
|            | ● Embryogenic callus (EC) | 26     | 83     | 8       | 25      | 142   |

**Table S2.** Analysis of Variance for callus types with three factors.

| Callus types              | Cultivar (DF = 2)           |        |        |                         | Substrate (DF = 1)              |        |        |          | Sterilization (DF = 1)           |                    |        |         |
|---------------------------|-----------------------------|--------|--------|-------------------------|---------------------------------|--------|--------|----------|----------------------------------|--------------------|--------|---------|
|                           | SumSq                       | MeanSq | Fvalue | Pr(>F)                  | SumSq                           | MeanSq | Fvalue | Pr(>F)   | SumSq                            | MeanSq             | Fvalue | Pr(>F)  |
| CT                        | 1.024                       | 0.512  | 15.345 | $4 \times 10^{-6} ***$  | 0.261                           | 0.261  | 7.813  | 0.007 ** | 0.081                            | 0.081              | 2.423  | 0.125   |
| FC                        | 0.088                       | 0.044  | 1.352  | 0.267                   | 0.129                           | 0.129  | 3.959  | 0.051    | 0.028                            | 0.028              | 0.852  | 0.360   |
| HC                        | 0.268                       | 0.134  | 8.898  | $4 \times 10^{-4} ***$  | 0.023                           | 0.023  | 1.529  | 0.221    | 0.002                            | 0.002              | 0.146  | 0.704   |
| EC                        | 1.199                       | 0.599  | 88.695 | $2 \times 10^{-16} ***$ | 0.028                           | 0.028  | 4.195  | 0.045 *  | 0.047                            | 0.047              | 6.894  | 0.011 * |
| <b>Factor Interaction</b> |                             |        |        |                         |                                 |        |        |          |                                  |                    |        |         |
| Callus types              | Cultivar*Substrate (DF = 2) |        |        |                         | Cultivar*Sterilization (DF = 2) |        |        |          | Substrate*Sterilization (DF = 1) |                    |        |         |
|                           | SumSq                       | MeanSq | Fvalue | Pr(>F)                  | SumSq                           | MeanSq | Fvalue | Pr(>F)   | SumSq                            | MeanSq             | Fvalue | Pr(>F)  |
| CT                        | 0.083                       | 0.041  | 1.237  | 0.298                   | 0.236                           | 0.118  | 3.530  | 0.036 *  | 0.015                            | 0.015              | 0.453  | 0.504   |
| FC                        | 0.019                       | 0.009  | 0.292  | 0.748                   | 0.125                           | 0.062  | 1.918  | 0.156    | 0.054                            | 0.054              | 1.650  | 0.204   |
| HC                        | 0.030                       | 0.015  | 0.992  | 0.377                   | 0.043                           | 0.021  | 1.412  | 0.252    | 0.005                            | 0.005              | 0.312  | 0.579   |
| EC                        | 0.208                       | 0.104  | 15.376 | $4 \times 10^{-6} ***$  | 0.067                           | 0.033  | 4.931  | 0.011 *  | $2 \times 10^{-4}$               | $2 \times 10^{-4}$ | 0.025  | 0.875   |

\*\*\* =  $p < 0.001$ ; \*\* =  $p < 0.01$ ; \* =  $p < 0.05$

**Table S3.** Analysis of Variance of embryogenic calluses (EC) on each Cultivar

| Cultivar   | Substrate (DF = 1) |                    |        |          | Sterilization (DF = 1) |        |        |          | Substrate*Sterilization (DF = 1) |                    |                    |        |
|------------|--------------------|--------------------|--------|----------|------------------------|--------|--------|----------|----------------------------------|--------------------|--------------------|--------|
|            | SumSq              | MeanSq             | Fvalue | Pr(>F)   | SumSq                  | MeanSq | Fvalue | Pr(>F)   | SumSq                            | MeanSq             | Fvalue             | Pr(>F) |
| Italia     | $3 \times 10^{-4}$ | $3 \times 10^{-4}$ | 0.092  | 0.763    | 0.0230                 | 0.0230 | 7.812  | 0.008 ** | $2 \times 10^{-6}$               | $2 \times 10^{-6}$ | $8 \times 10^{-4}$ | 0.978  |
| Aglianico  | 0.003              | 0.003              | 0.273  | 0.611    | 0.008                  | 0.008  | 0.779  | 0.395    | 0.006                            | 0.006              | 0.579              | 0.461  |
| Chardonnay | 0.246              | 0.246              | 12.492 | 0.008 ** | 0.069                  | 0.069  | 3.545  | 0.096    | 0.003                            | 0.003              | 0.152              | 0.706  |

\*\*\* =  $p < 0.001$ ; \*\* =  $p < 0.01$ ; \* =  $p < 0.05$
